# Supplementary material for: Exercise induces new cardiomyocyte generation in the adult mammalian heart
Source: PubMed Central journal article supplement (PMC5916892; doi:10.1038/s41467-018-04083-1), 2018-04-25
Supplement: 41467_2018_4083_MOESM1_ESM.pdf [file 41467_2018_4083_MOESM1_ESM.pdf]

**Supplementary Materials for**

**Exercise induces new cardiomyocyte generation in the adult mammalian heart**

**Vujic and Lerchenmüller et al.**

Supplementary Figure 1

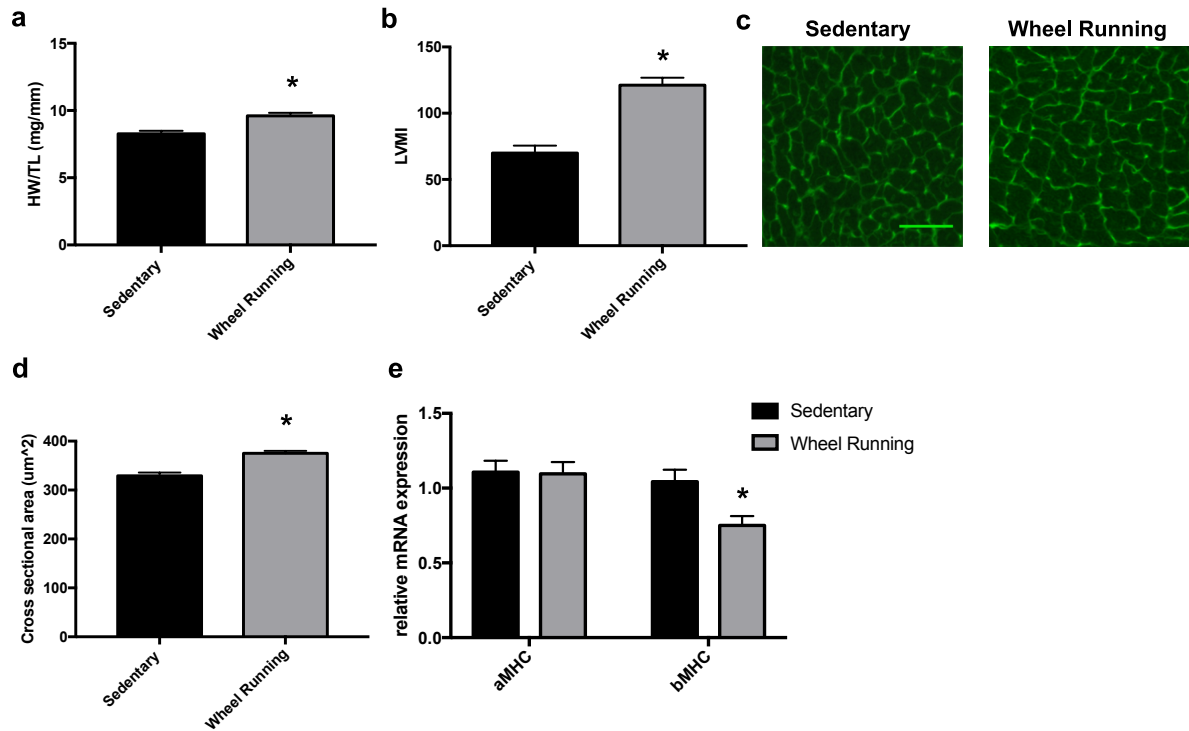

### Supplementary Figure 1. Voluntary wheel running exercise induces cardiac hypertrophy in young mice.

**a** Heart weight to tibia length ratio was significantly increased in young adult mice when compared to aged-matched sedentary animals (n=8 mice/group, \*p<0.05, student's t-test). **b** Echocardiographic analysis of the left ventricular mass index (LVMI) from exercised and age-matched sedentary animals (n=4 mice/group, \*p<0.05, student's t-test). **c-d** Representative images of cardiomyocyte Cross Sectional Area (CSA) analyzed from wheat-germ-agglutinin stained transverse heart sections. Scale bar = 50µm 300 cardiomyocytes were counted per group (n=3 mice/group, \*p<0.05, student's t-test). CSA increases 14% in response to exercise. **e** Anticipated switch of alpha/beta myosin heavy chain gene expression after voluntary wheel running (n=4 mice/group, \*p=0.05, student's t-test). Results are presented as mean ± s.e.m.

Supplementary Figure 2

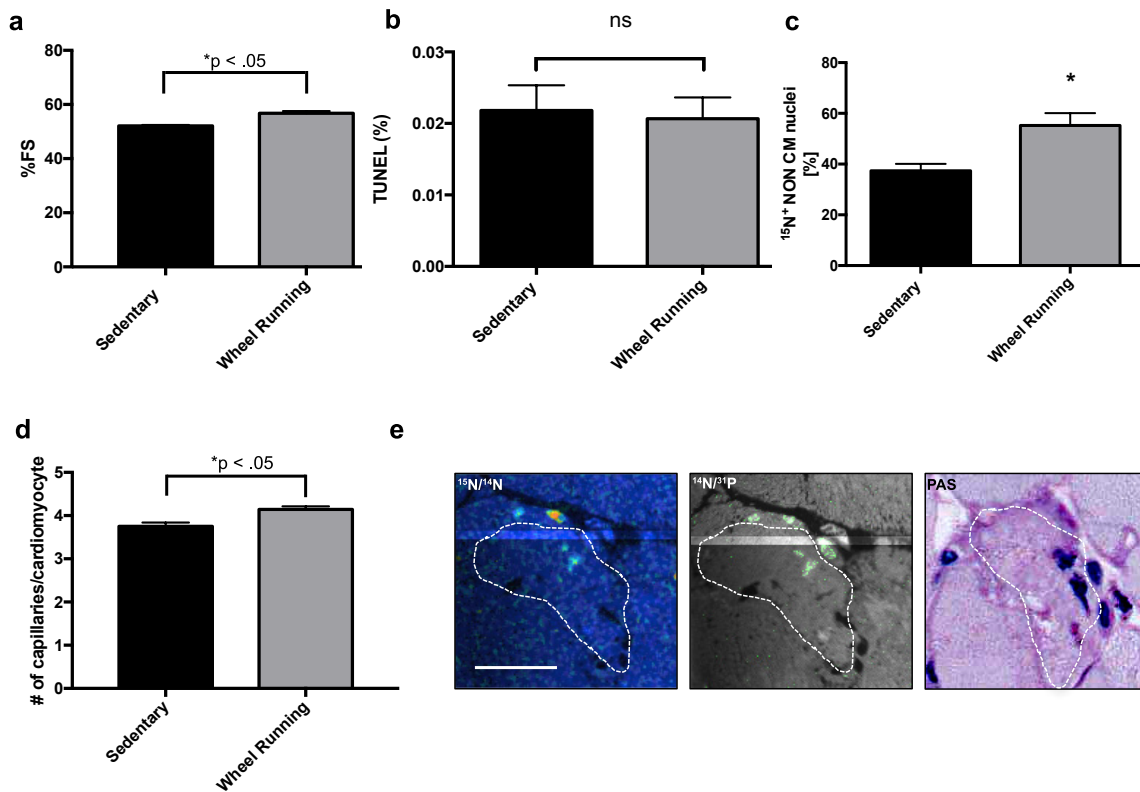

**Supplementary Figure 2. Cardiomyogenesis and cardiac growth in response to exercise is due to physiologic and not pathologic remodeling. a**

Echocardiographic analysis shows an improved fractional shortening (%FS) in exercised and age-matched sedentary animals (n=4 mice/group, \*p<0.05, student's t-test). **b** Quantification of apoptotic cardiomyocytes by TUNEL staining (>14,000 nuclei were counted from 3-5 mice/group, p=ns, student's t-test). **c** Exercise increases <sup>15</sup>N<sup>+</sup> labeled non-cardiomyocyte fraction (sedentary: exercised = 37:55%) (>4000 non-cardiomyocytes from four mice/group were counted, \*p<0.05, student's t-test). **d** Number of capillaries measured by CD31 positive capillaries per cardiomyocyte in transverse heart sections increased by 10% after voluntary wheel running in comparison to matched control sedentary mice (n=3 mice/group, \*p<0.05, student's t-test). **e** Representative images of a <sup>15</sup>N-labeled cardiomyocyte nuclei undergoing cytokinesis. Mass image <sup>14</sup>N/<sup>31</sup>P (left), HSI mosaic tile <sup>15</sup>N/<sup>14</sup>N (center) and adjacent section with Periodic acid Schiff staining (PAS)(right). The color scale in the HIS image ranges from blue, where the ratio is equivalent to natural ratio (0.37 %, expressed as 0% above natural ratio (enrichment over natural ratio)), to red, where the ratio is 150 % above natural ratio. Scale bar = 25µm). Results are presented as mean ± s.e.m.

Supplementary Figure 3

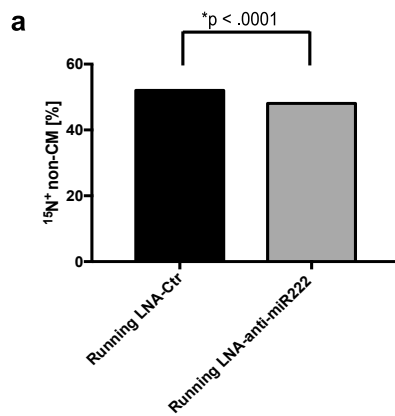

**Supplementary Figure 3. Inhibition of miR222 reduces non-cardiomyocyte DNA synthesis**

**a** Mice (2 months old) treated with LNA-anti-miR222 undergoing voluntary wheel running show a reduction in non-cardiomyocyte DNA synthesis (n=4 mice/group,  $*p < 0.0001$  Running LNA-scr-miR vs Running LNA-anti-miR222, Fisher's exact test).
